# Supplementary material for: Vapochromic behaviour of a gold(i)–lead(ii) complex as a VOC sensor
Source: Royal Society of Chemistry journal article supplement (doi:10.1039/d3dt02000b), 2023-01-01
Supplement: d3dt02000b1.pdf [file d3dt02000b1.pdf]

## Vapochromic Behavior of a Gold(I)-Lead(II) complex as a VOC Sensor

Sonia Moreno, David Royo, Abdel G. El-Hachimi, María Rodríguez-Castillo, Miguel Monge, M. Elena Olmos\* and José M. López-de-Luzuriaga\*

Departamento de Química, Universidad de La Rioja, Centro de Investigación en Síntesis Química (CISQ), Complejo Científico-Tecnológico, 26006 – Logroño, Spain

### Electronic Supplementary Information

#### I. Characterization of the complexes

|                                                                                       |    |
|---------------------------------------------------------------------------------------|----|
| 1. <sup>1</sup> H NMR signal assignment .....                                         | 2  |
| 2. IR spectra .....                                                                   | 2  |
| 3. <sup>1</sup> H NMR spectra (300 MHz, 298K) .....                                   | 4  |
| 4. <sup>19</sup> F NMR spectra (282 MHz, 298K).....                                   | 5  |
| 5. Single crystal and powder X-ray diffraction analysis of compounds <b>2-5</b> ..... | 7  |
| 6. Powder X-ray diffraction analysis .....                                            | 10 |
| 7. Lifetimes.....                                                                     | 17 |

#### II. Computational studies

|                              |    |
|------------------------------|----|
| 1. Model systems .....       | 24 |
| 2. Population analysis ..... | 24 |

## I. Characterization of the complexes

### 1. $^1\text{H}$ NMR signal assignment

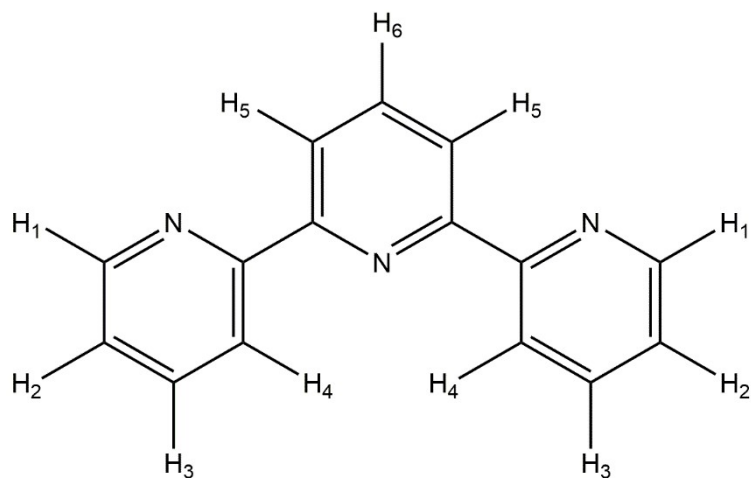

Figure S1.  $^1\text{H}$  NMR signal assignment of terpyridine ligand.

### 2. IR spectra

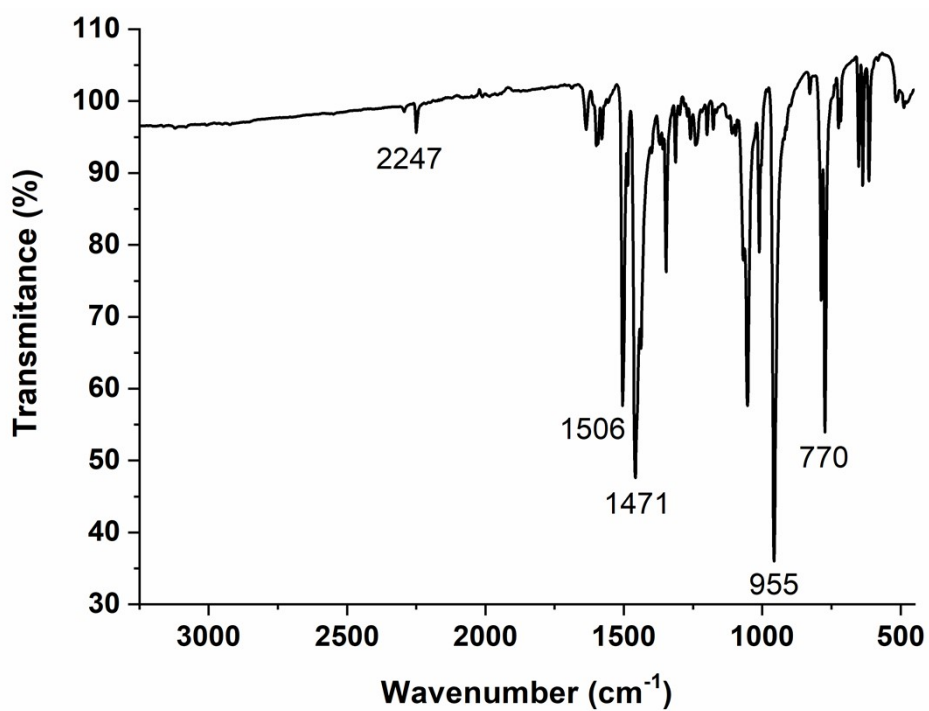

Figure S2. FT-IR spectrum of complex 2.

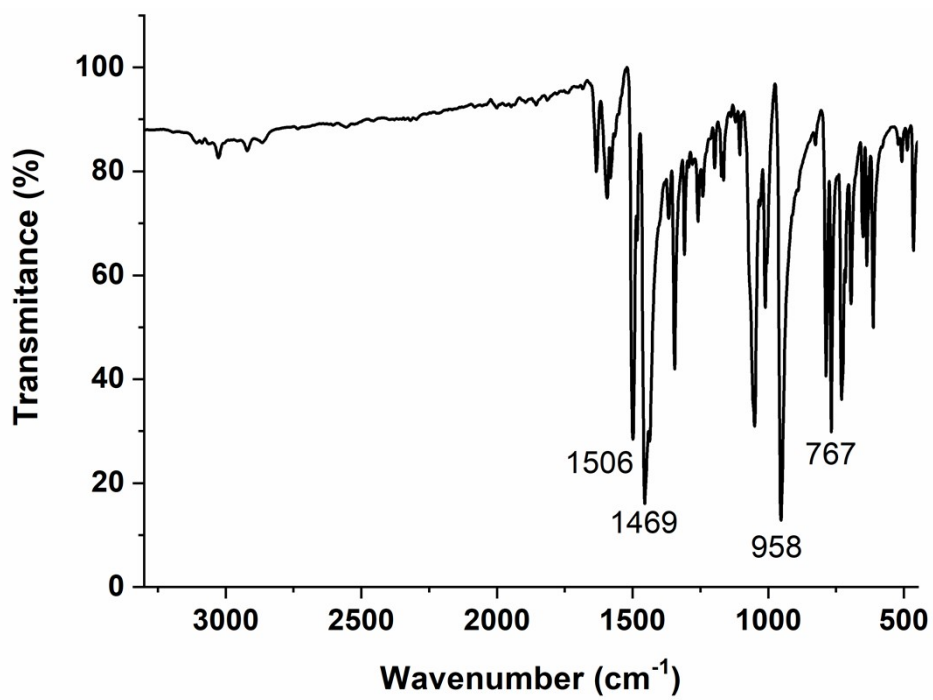

Figure S3. FT-IR spectrum of complex 3.

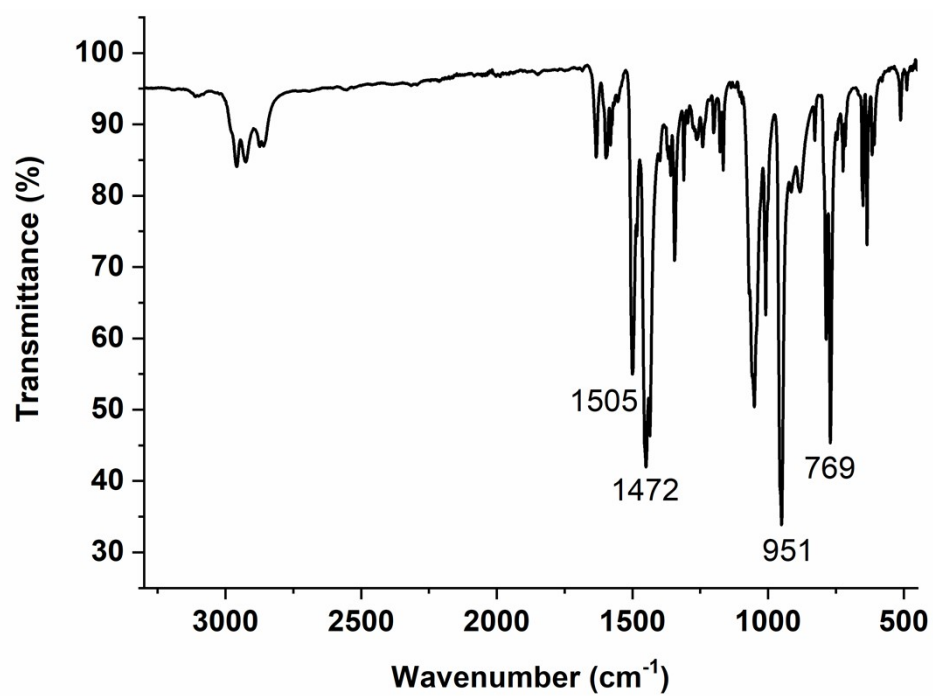

Figure S4. FT-IR spectrum of complex 4.

### 3. $^1\text{H}$ NMR spectra (300 MHz, 298K)

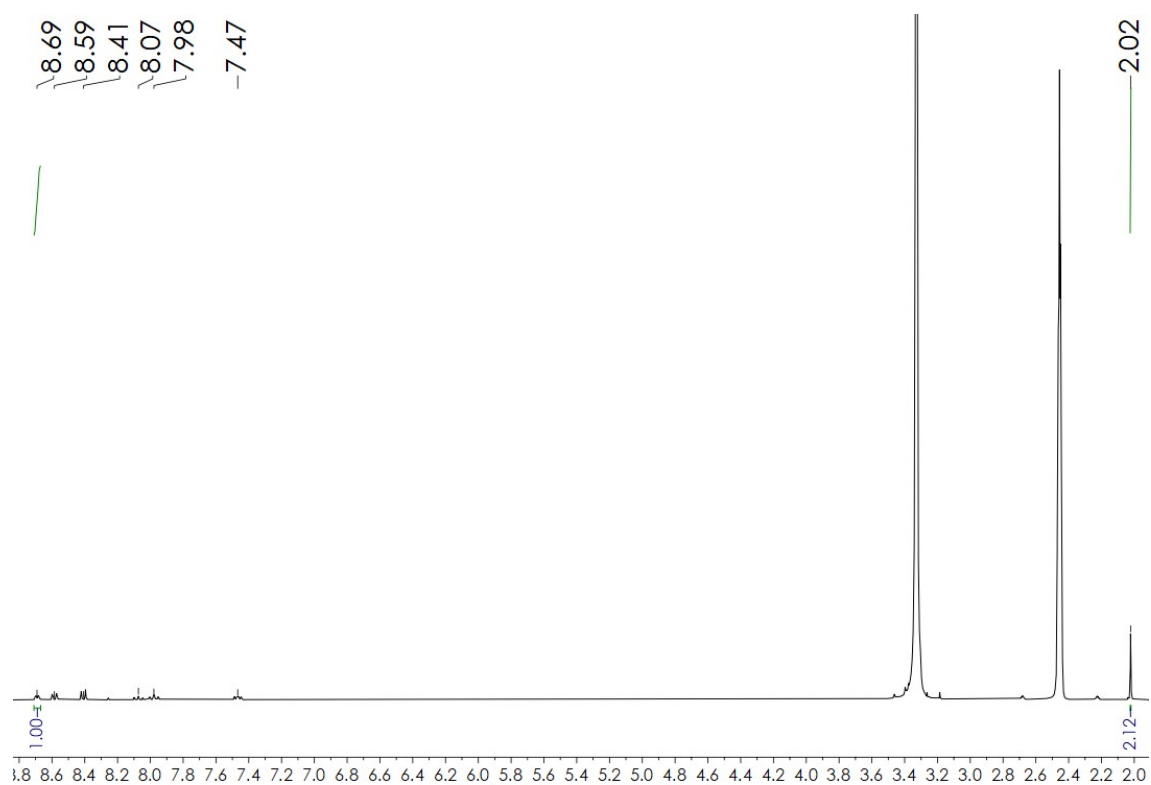

Figure S5.  $^1\text{H}$  NMR spectrum of complex **2** in  $[\text{D}_6]\text{-DMSO}$ .

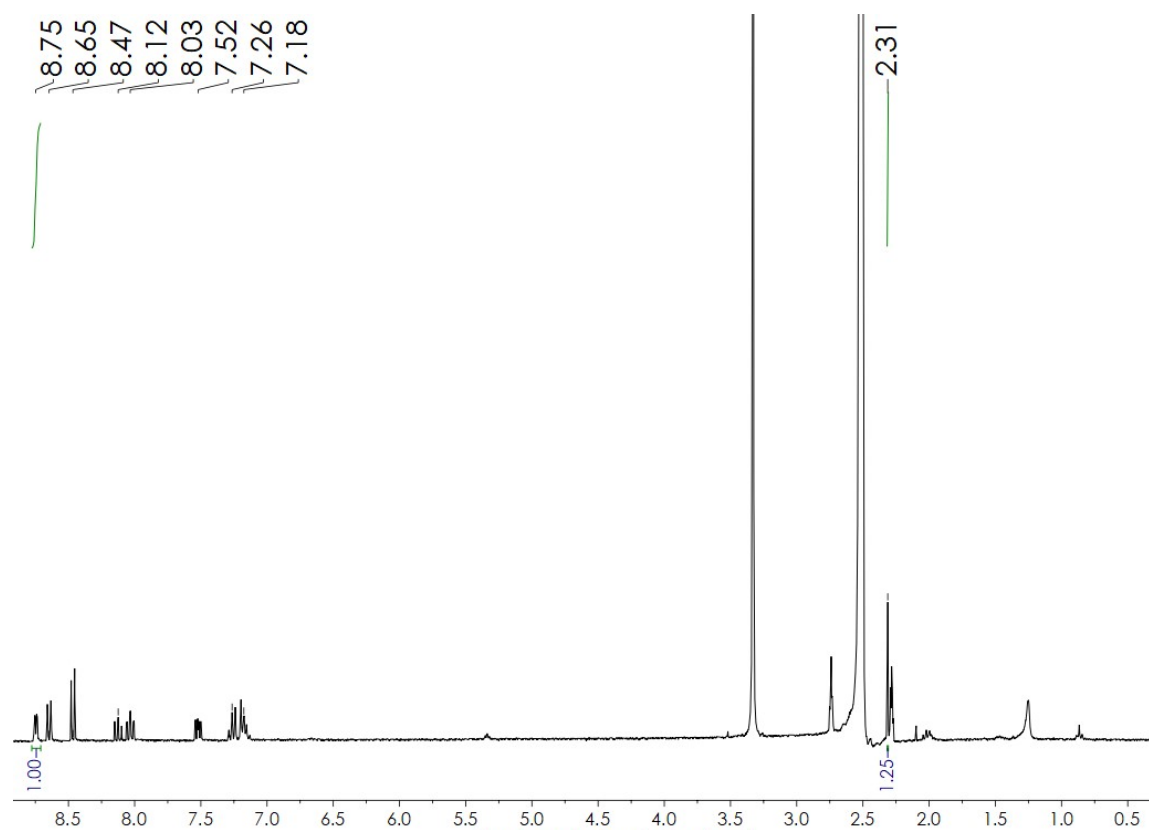

Figure S6.  $^1\text{H}$  NMR spectrum of complex **3** in  $[\text{D}_6]\text{-DMSO}$ .

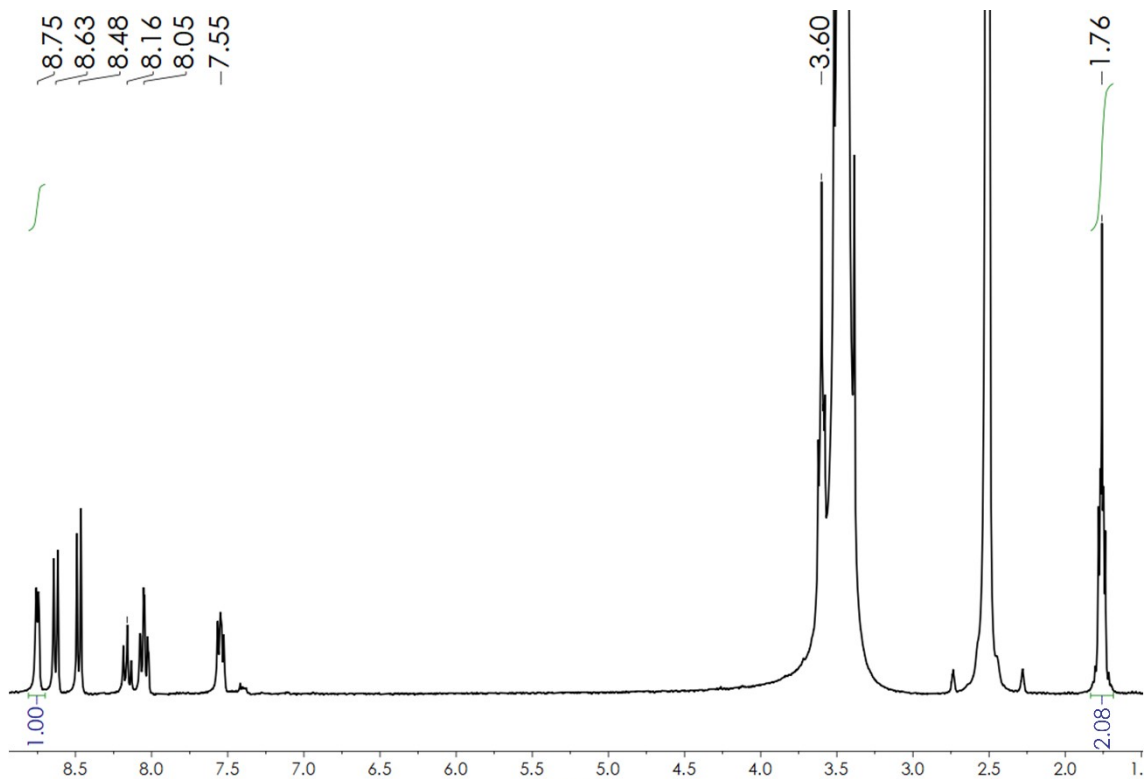

Figure S7.  $^1\text{H}$  NMR spectrum of complex 4 in  $[\text{D}_6]\text{-DMSO}$ .

4.  $^{19}\text{F}$  NMR spectra (282 MHz, 298K)

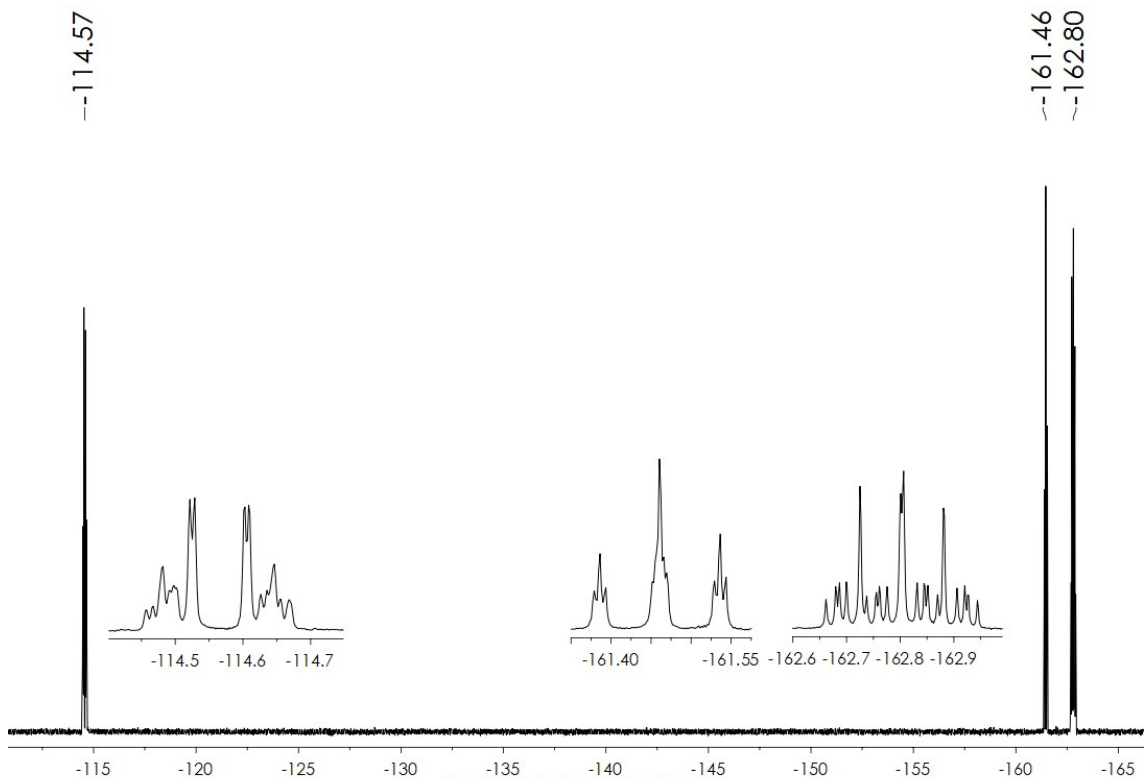

Figure S8.  $^{19}\text{F}$  NMR spectrum of complex 2 in  $[\text{D}_6]\text{-DMSO}$ .

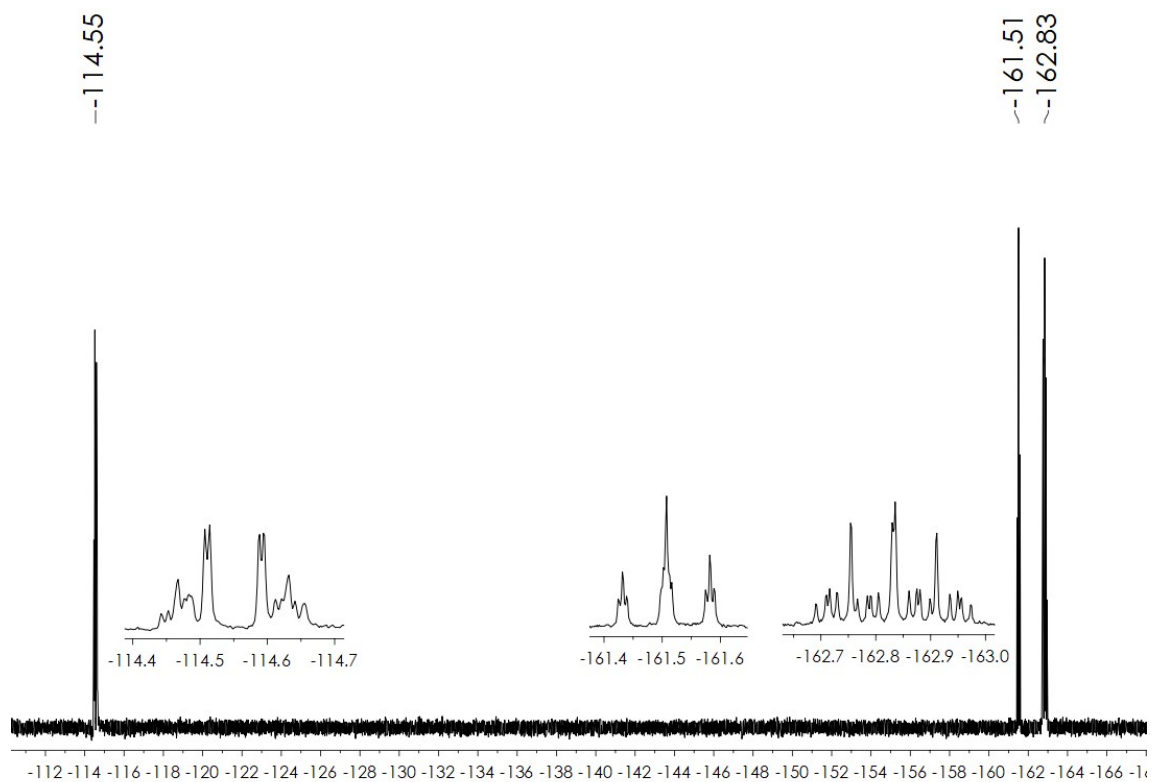

Figure S9.  $^{19}\text{F}$  NMR spectrum of complex **3** in  $[\text{D}_6]$ -DMSO.

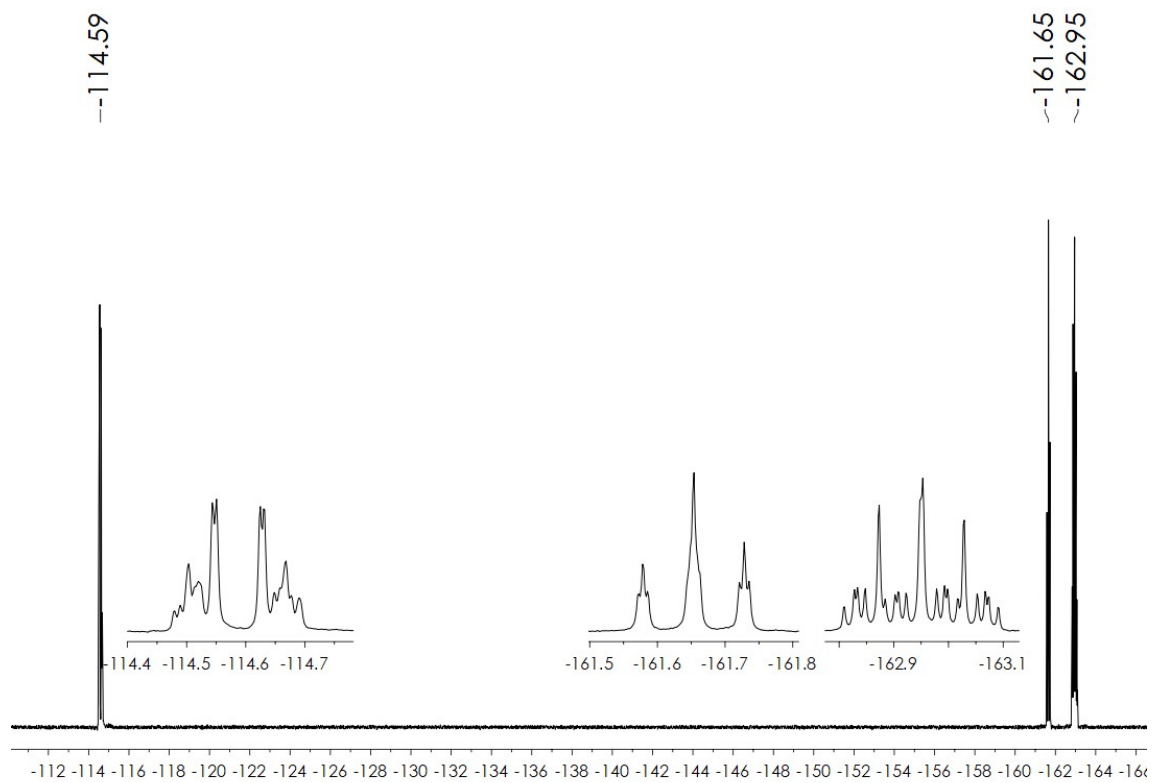

Figure S10.  $^{19}\text{F}$  NMR spectrum of complex **4** in  $[\text{D}_6]$ -DMSO.

## 5. Single crystal analysis of compounds 2-4.

**Table S1.** Data collection and structure refinement details for 2-4.

|                                                               | <b>2</b>                                                                                                             | <b>3</b>                                                                                                        | <b>4</b>                                                                                                             |
|---------------------------------------------------------------|----------------------------------------------------------------------------------------------------------------------|-----------------------------------------------------------------------------------------------------------------|----------------------------------------------------------------------------------------------------------------------|
| Chemical Formula                                              | C <sub>39</sub> H <sub>11</sub> Au <sub>2</sub> F <sub>20</sub> N <sub>3</sub> Pb·2(C <sub>2</sub> H <sub>3</sub> N) | C <sub>39</sub> H <sub>11</sub> Au <sub>2</sub> F <sub>20</sub> N <sub>3</sub> Pb·C <sub>7</sub> H <sub>8</sub> | C <sub>39</sub> H <sub>11</sub> Au <sub>2</sub> F <sub>20</sub> N <sub>3</sub> Pb·2(C <sub>4</sub> H <sub>8</sub> O) |
| Crystal habit                                                 | Yellow prism                                                                                                         | Green prism                                                                                                     | Yellow prism                                                                                                         |
| Crystal size/mm                                               | 0.148x0.094x0.063                                                                                                    | 0.125x0.075x0.075                                                                                               | 0.250x0.248x0.247                                                                                                    |
| Crystal system                                                | Triclinic                                                                                                            | Monoclinic                                                                                                      | Triclinic                                                                                                            |
| Space group                                                   | P-1                                                                                                                  | Cc                                                                                                              | P-1                                                                                                                  |
| <i>a</i> /Å                                                   | 13.3822(11)                                                                                                          | 11.7382(5)                                                                                                      | 9.4745(10)                                                                                                           |
| <i>b</i> /Å                                                   | 16.9843(16)                                                                                                          | 25.0335(13)                                                                                                     | 14.2971(15)                                                                                                          |
| <i>c</i> /Å                                                   | 20.4646(18)                                                                                                          | 15.6517(6)                                                                                                      | 17.8209(17)                                                                                                          |
| $\alpha$ /°                                                   | 69.099(3)                                                                                                            | 90                                                                                                              | 107.528(3)                                                                                                           |
| $\beta$ /°                                                    | 77.706(4)                                                                                                            | 105.334(3)                                                                                                      | 94.633(3)                                                                                                            |
| $\gamma$ /°                                                   | 88.931(4)                                                                                                            | 90                                                                                                              | 93.988(4)                                                                                                            |
| <i>V</i> /Å <sup>3</sup>                                      | 4237.3(7)                                                                                                            | 4435.5(3)                                                                                                       | 2283.2(4)                                                                                                            |
| <i>Z</i>                                                      | 4                                                                                                                    | 4                                                                                                               | 2                                                                                                                    |
| <i>D<sub>c</sub></i> /g cm <sup>-3</sup>                      | 2.482                                                                                                                | 2.388                                                                                                           | 2.395                                                                                                                |
| <i>M</i>                                                      | 1584.74                                                                                                              | 1594.76                                                                                                         | 1646.84                                                                                                              |
| F(000)                                                        | 2920                                                                                                                 | 2944                                                                                                            | 1532                                                                                                                 |
| <i>T</i> /°C                                                  | -100                                                                                                                 | -100                                                                                                            | -100                                                                                                                 |
| 2 $\theta$ max/°                                              | 52                                                                                                                   | 51                                                                                                              | 56                                                                                                                   |
| $\mu$ (Mo-K $\alpha$ )/mm <sup>-1</sup>                       | 11.001                                                                                                               | 10.509                                                                                                          | 10.215                                                                                                               |
| No. refl. Measured                                            | 134396                                                                                                               | 28760                                                                                                           | 48068                                                                                                                |
| No. unique refl.                                              | 16682                                                                                                                | 7888                                                                                                            | 10904                                                                                                                |
| <i>R</i> <sub>int</sub>                                       | 0.0507                                                                                                               | 0.0902                                                                                                          | 0.0405                                                                                                               |
| <i>R</i> [ <i>F</i> >2 $\sigma$ ( <i>F</i> )] <sup>[a]</sup>  | 0.0357                                                                                                               | 0.0435                                                                                                          | 0.0230                                                                                                               |
| <i>wR</i> [ <i>F</i> <sup>2</sup> , all refl.] <sup>[b]</sup> | 0.1024                                                                                                               | 0.0910                                                                                                          | 0.0462                                                                                                               |
| No. of refl. Used [ <i>F</i> >2 $\sigma$ ( <i>F</i> )]        | 16682                                                                                                                | 7888                                                                                                            | 10904                                                                                                                |
| No. of parameters                                             | 1271                                                                                                                 | 645                                                                                                             | 670                                                                                                                  |
| No. of restraints                                             | 320                                                                                                                  | 266                                                                                                             | 20                                                                                                                   |
| <i>S</i> <sup>[c]</sup>                                       | 1.080                                                                                                                | 1.002                                                                                                           | 1.059                                                                                                                |
| Max. residual electron density/e·Å <sup>-3</sup>              | 3.579                                                                                                                | 1.035                                                                                                           | 0.81                                                                                                                 |

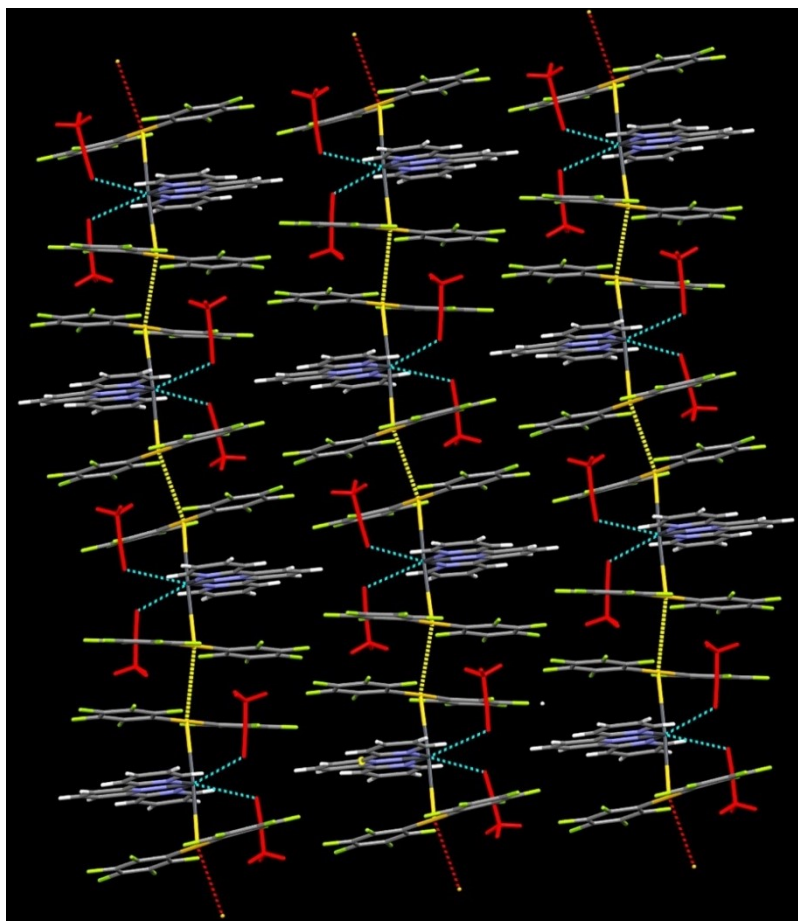

**Figure S11.** Crystal structure of **2** with the acetonitrile molecules in red.

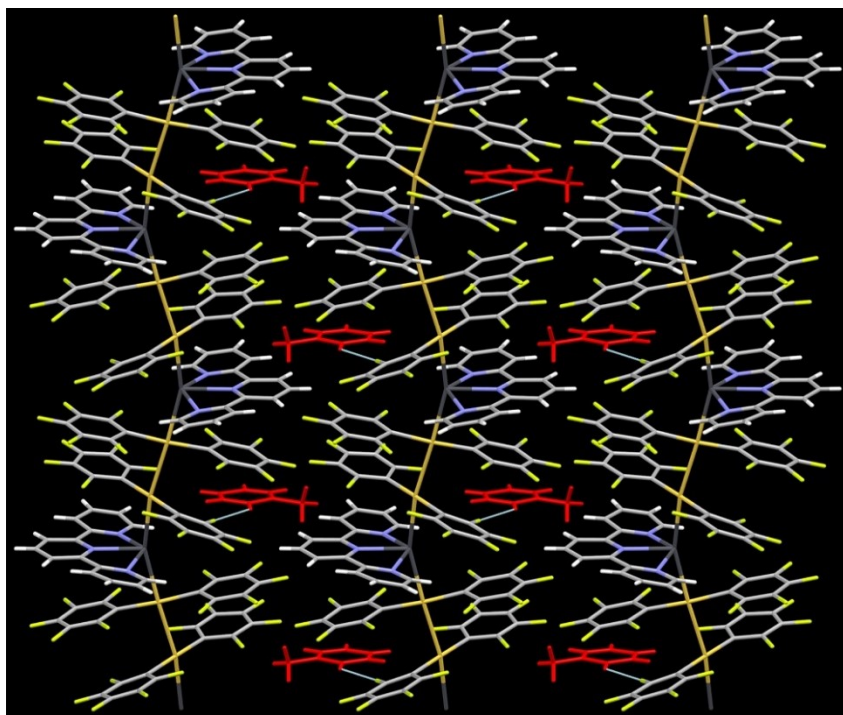

**Figure S12.** Crystal structure of **3** viewed down the crystallographic *x* axis with the toluene molecules in red.



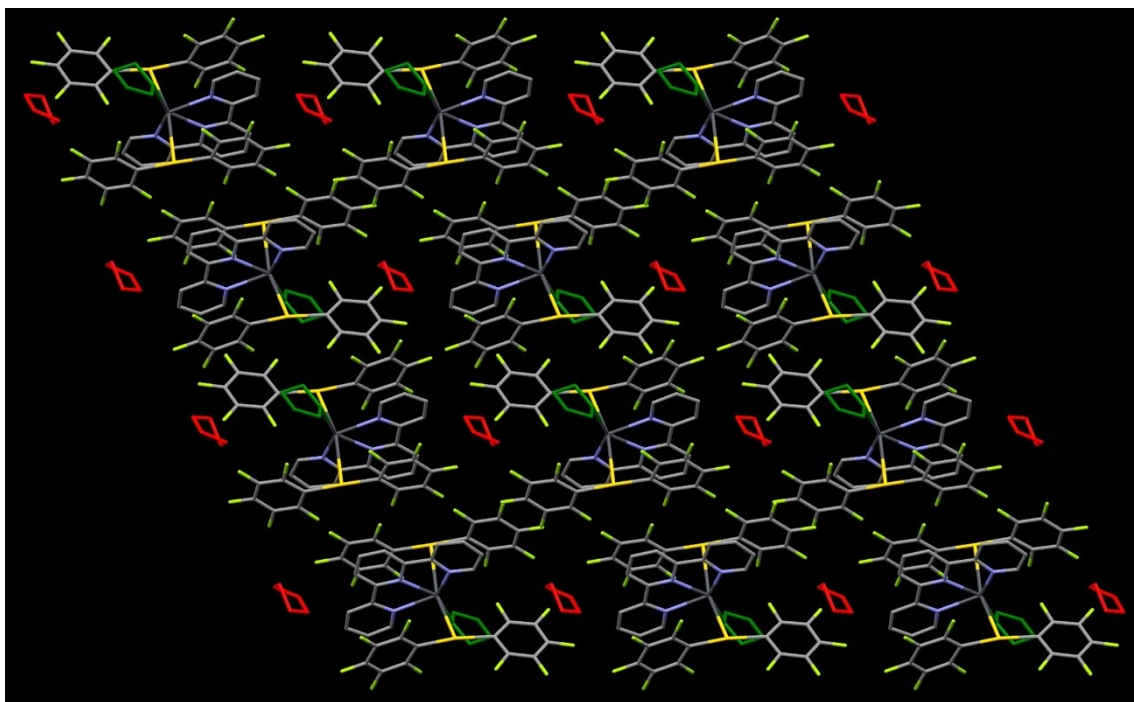

**Figure S13.** Crystal structure of **4** viewed down the crystallographic *x* axis with the coordinated THF molecules in green and the non-coordinated THF molecules in red. Hydrogen atoms have been omitted for clarity.

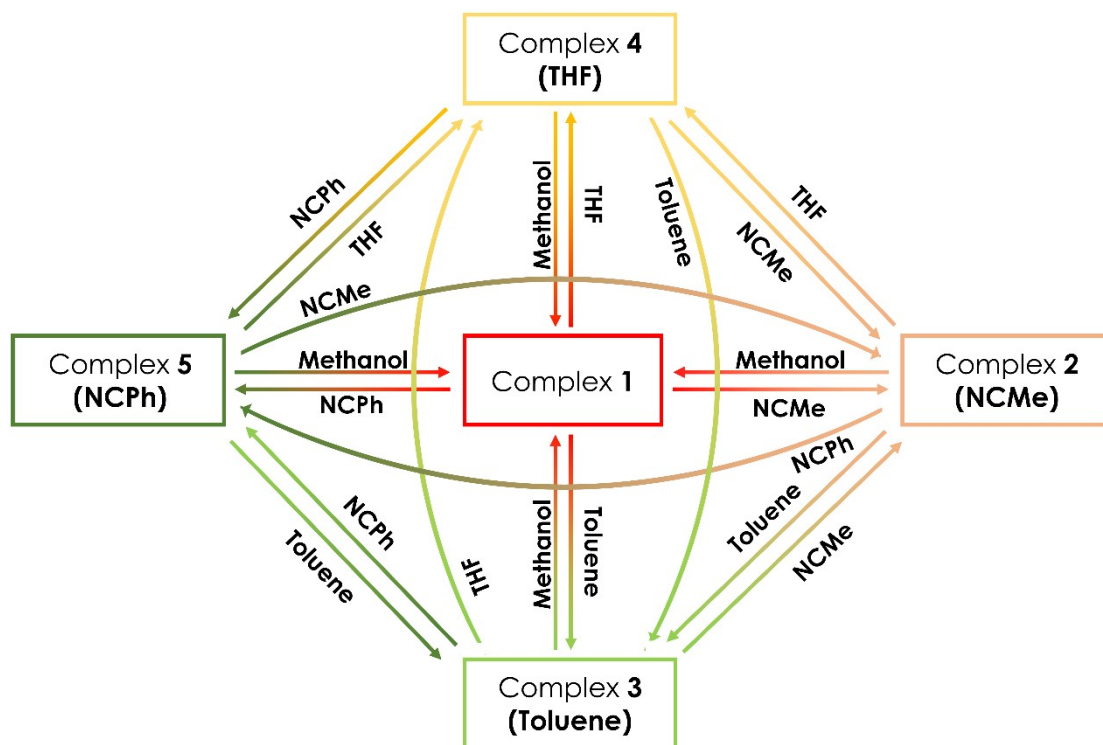

**Figure S14.** Schematic of the reversibility of compounds **1-5** through vapours of the different solvents.

## 6. Powder X-ray diffraction analysis.

X-ray diffraction measurements were carried out at the X-ray Diffraction and Fluorescence Analysis Service of the General Research Support Service of the University of Zaragoza. The data have been collected with a diffractometer "D-Max Rigaku, Ru300", provided with a Cu rotating anode. The diffractometer is operated at 40Kv and 80 mA and a graphite monochromator is used to select the Cu K $\alpha$  radiation. Measurement conditions from 2 $\theta$  3 $^\circ$  to 40 $^\circ$  step=0.03 t=1s/step.

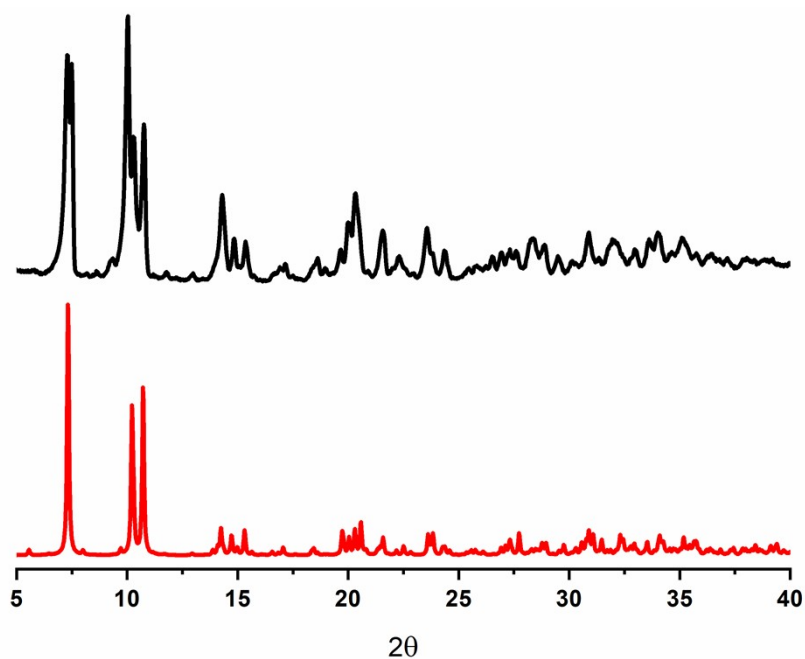

Figure S15. Theoretical (red) and experimental (black) X-ray powder pattern of complex 1.

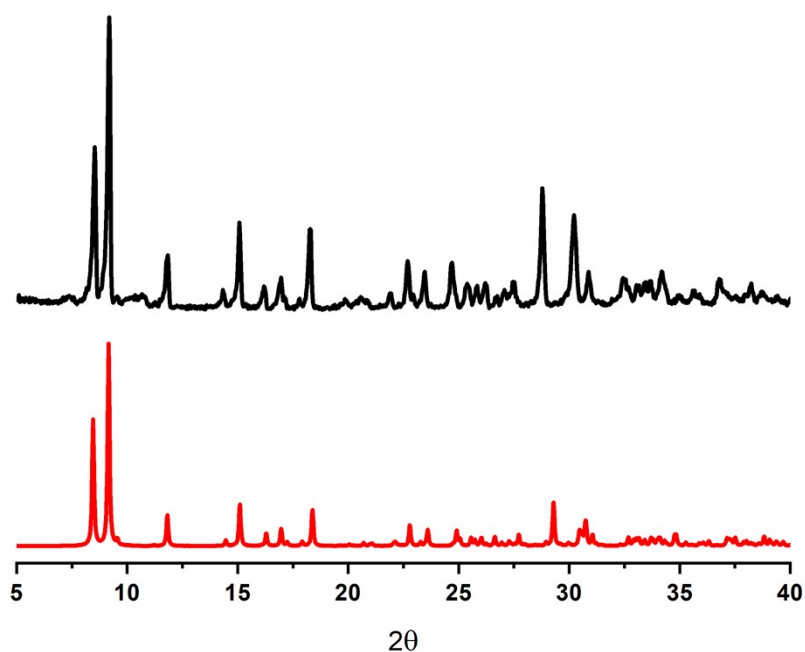

Figure S16. Theoretical (red) and experimental (black) X-ray powder pattern of complex 2.

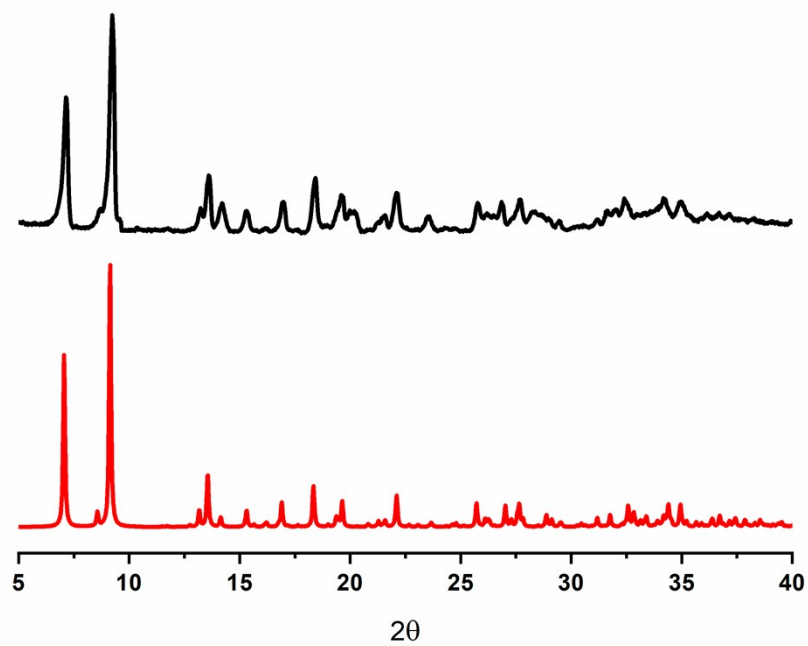

**Figure S17.** Theoretical (red) and experimental (black) X-ray powder pattern of complex 3.

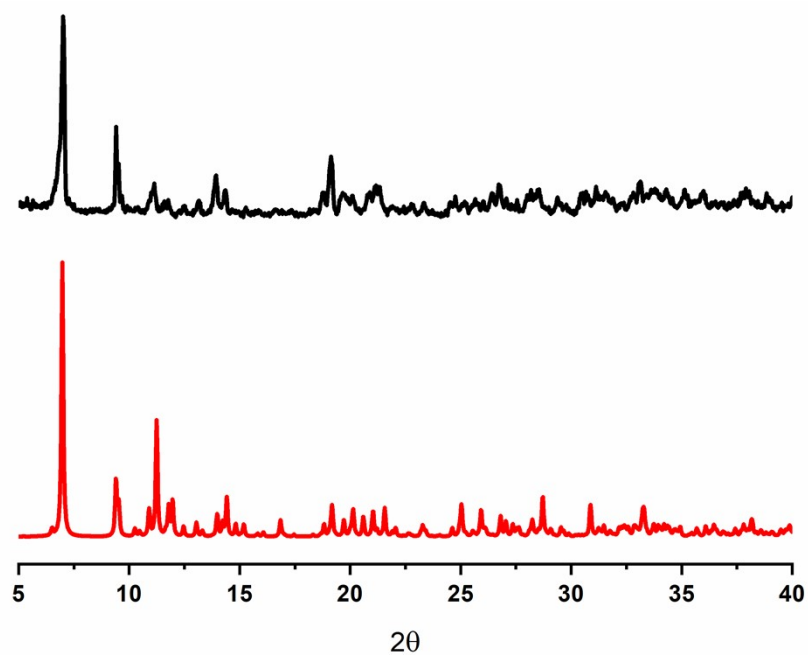

**Figure S18.** Theoretical (red) and experimental (black) X-ray powder pattern of complex 4.

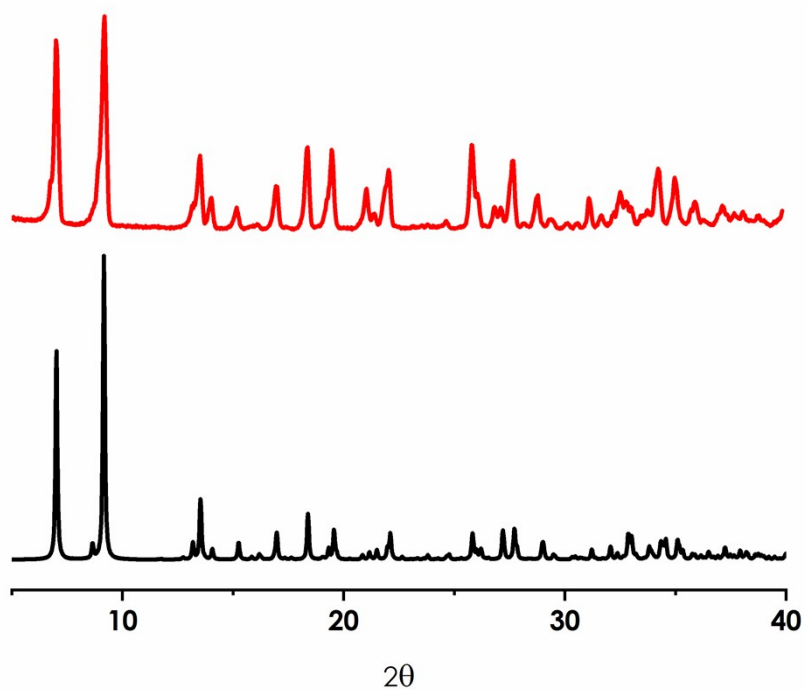

**Figure S19.** Theoretical (red) and experimental (black) X-ray powder pattern of complex 5.

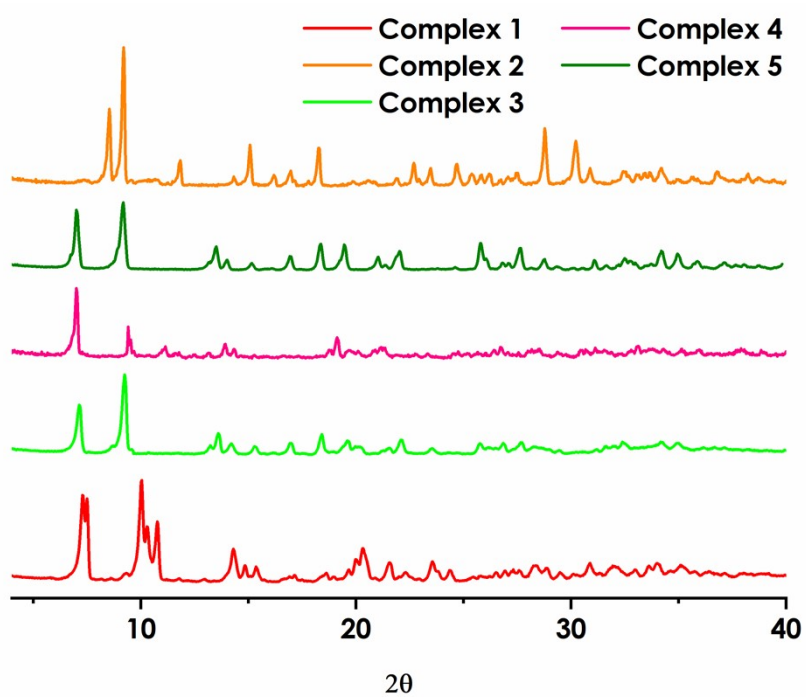

**Figure S20.** X-ray diffraction spectra of powder obtained by treatment of compound 1 (red) with acetonitrile (compound 2, orange), toluene (compound 3, light green), tetrahydrofuran (compound 4, pink) and benzonitrile (compound 5, dark green) vapours.

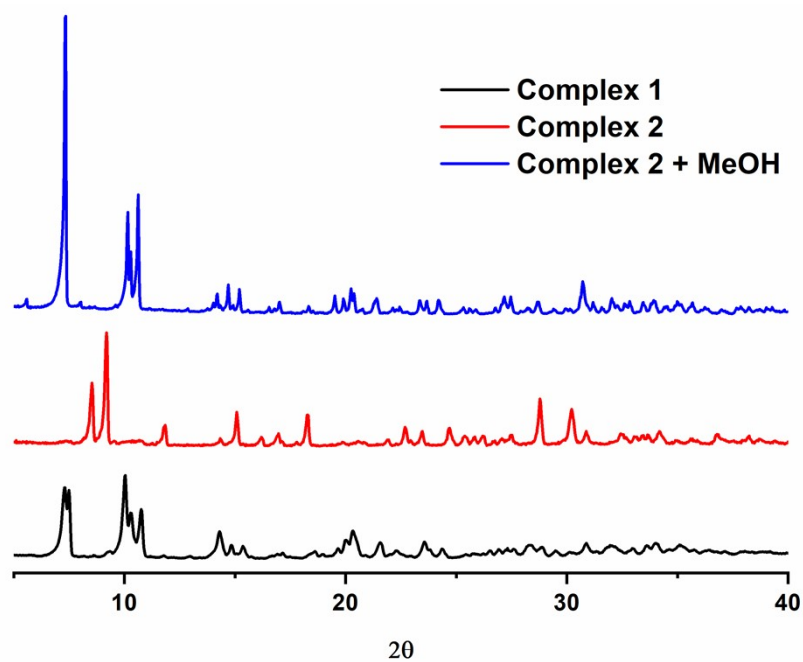

**Figure S21.** Experimental X-ray powder pattern of complex 1 (black), complex 2 (red) and complex 2 after contact with methanol (blue).

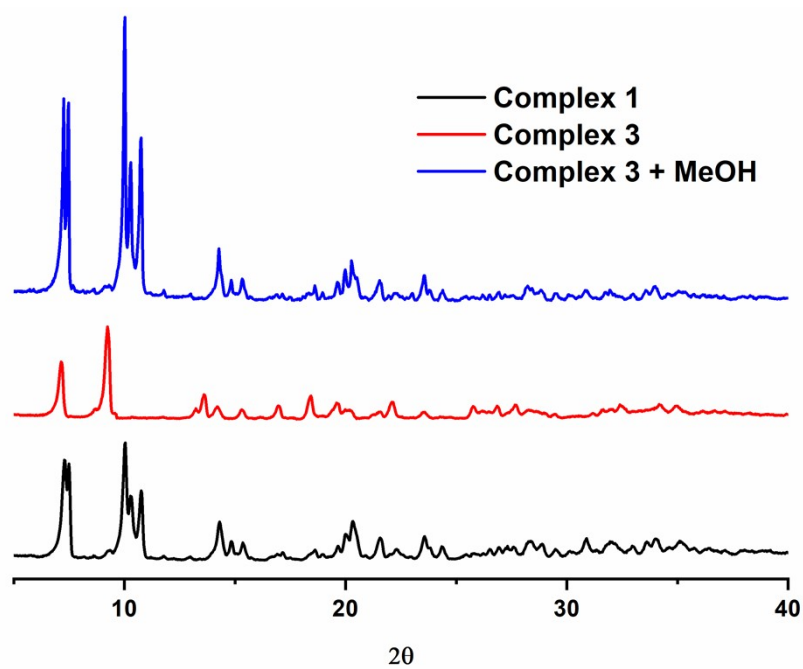

**Figure S22.** Experimental X-ray powder pattern of complex 1 (black), complex 3 (red) and complex 3 after contact with methanol (blue).

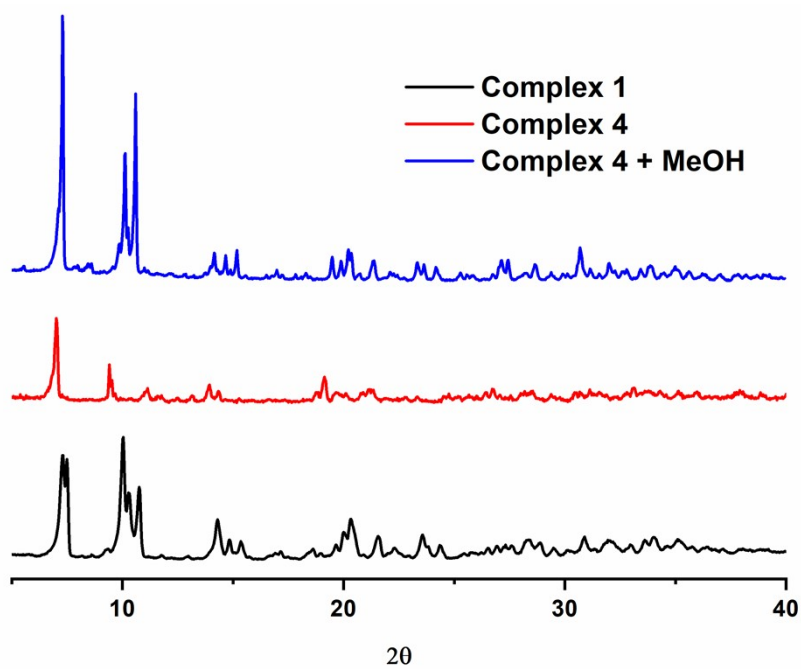

**Figure S23.** Experimental X-ray powder pattern of complex 1 (black), complex 4 (red) and complex 4 after contact with methanol (blue).

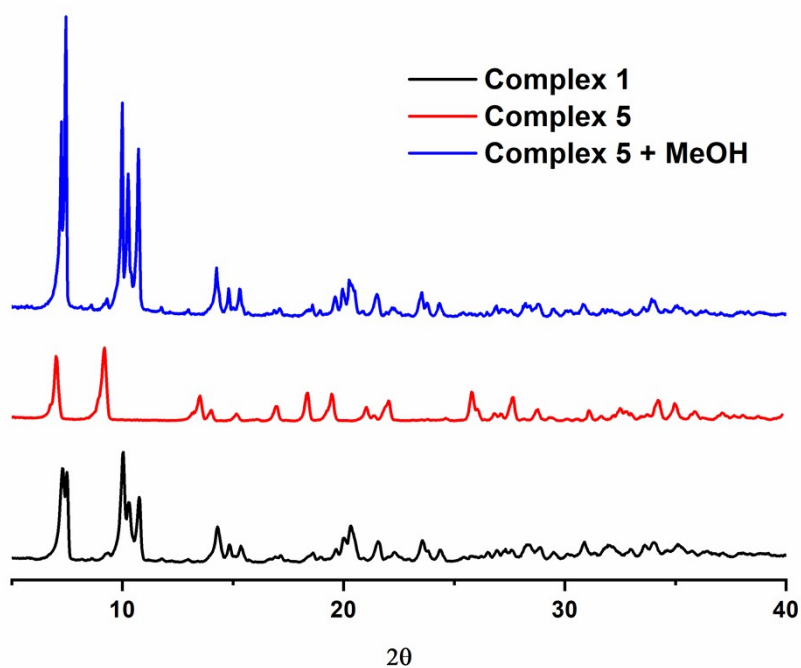

**Figure S24.** Experimental X-ray powder pattern of complex 1 (black), complex 5 (red) and complex 5 after contact with methanol (blue).

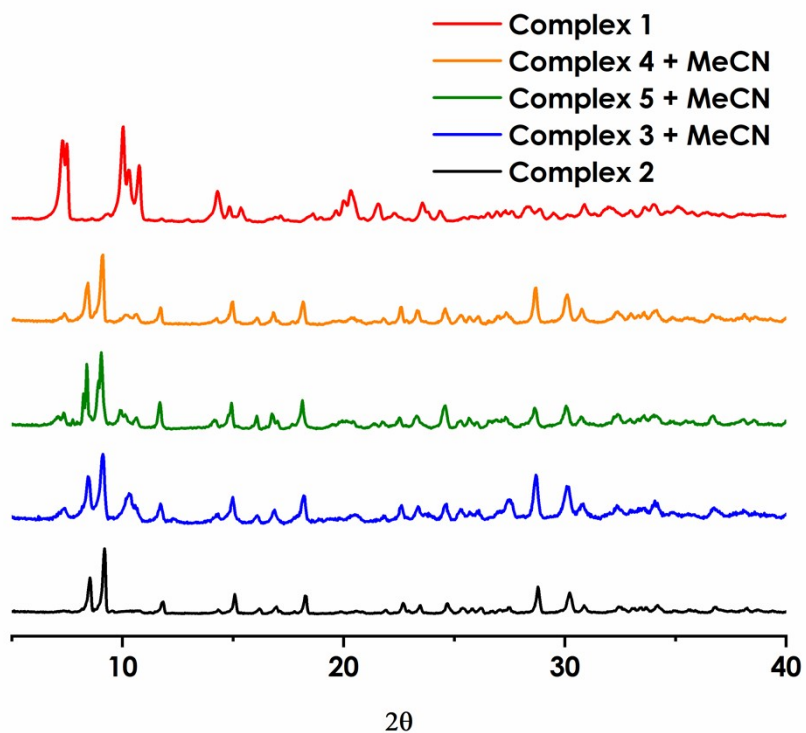

**Figure S25.** X-ray powder diffraction spectra of the conversion of compounds **3**, **4** and **5** to compound **2** upon exposure to acetonitrile vapours.

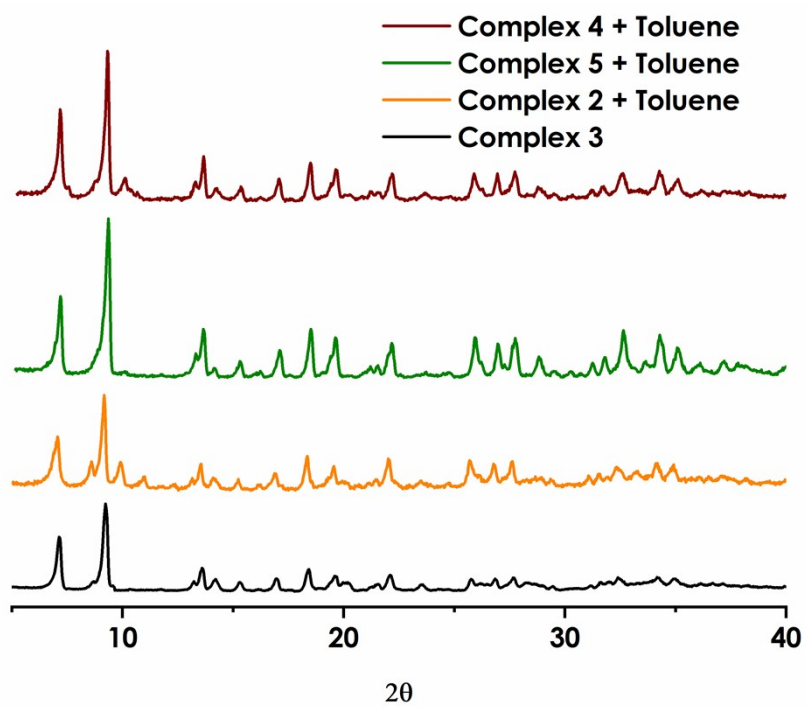

**Figure S26.** X-ray powder diffraction spectra of the conversion of compounds **2**, **4** and **5** to compound **3** upon exposure to toluene vapours.

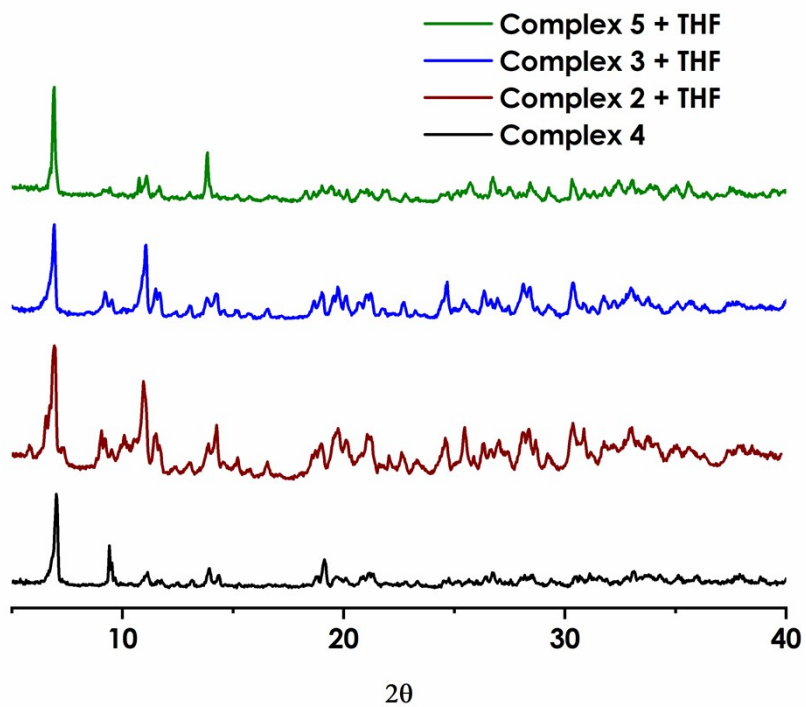

**Figure S27.** X-ray powder diffraction spectra of the conversion of compounds **2**, **3** and **5** to compound **4** upon exposure to toluene vapours.

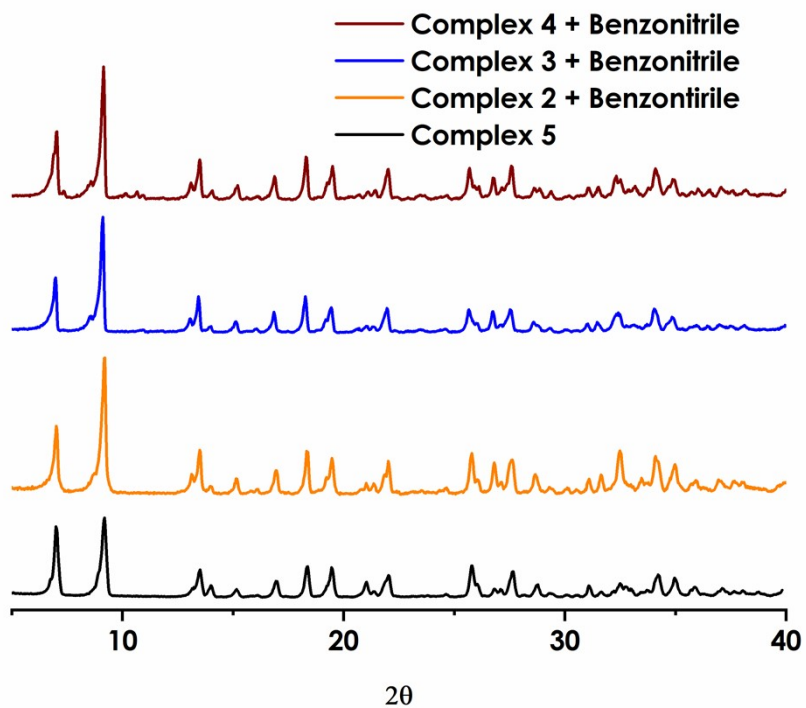

**Figure S28.** X-ray powder diffraction spectra of the conversion of compounds **2**, **3** and **4** to compound **5** upon exposure to toluene vapours.



## 7. Lifetimes

### ➤ Complex 2:

RT

Emission centred at 550 nm, excitation nanoled of 370 nm:

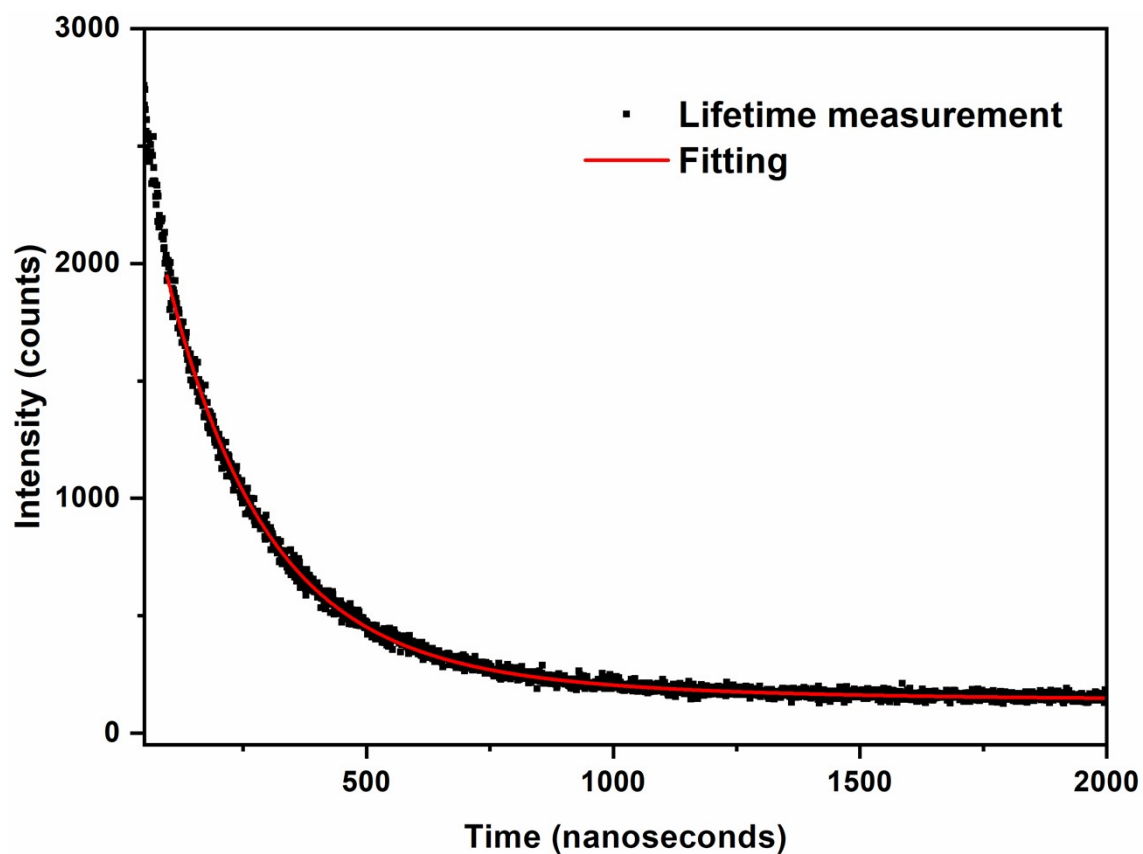

Figure S29. Lifetime decay for complex 2 at room temperature.

|                            | Value     | Std Dev   |           | Value    | Std Dev  | Rel % |
|----------------------------|-----------|-----------|-----------|----------|----------|-------|
| $\tau_1$                   | 6.751E-7  | 1.243E-8  | <b>B1</b> | 1556.181 | 5.954128 | 68.15 |
| $\tau_2$                   | 1.963E-06 | 4.983E-08 | <b>B2</b> | 250.0792 | 2.838904 | 31.85 |
| $\langle\tau\rangle_{amp}$ | 0.853E-6  |           |           |          |          |       |
| Chisq                      | 1.020     |           | <b>A</b>  | 140.8187 |          |       |
| Shift                      | 0         |           |           |          |          |       |

77 K

Emission centred at 580 nm, excitation of 480 nm:

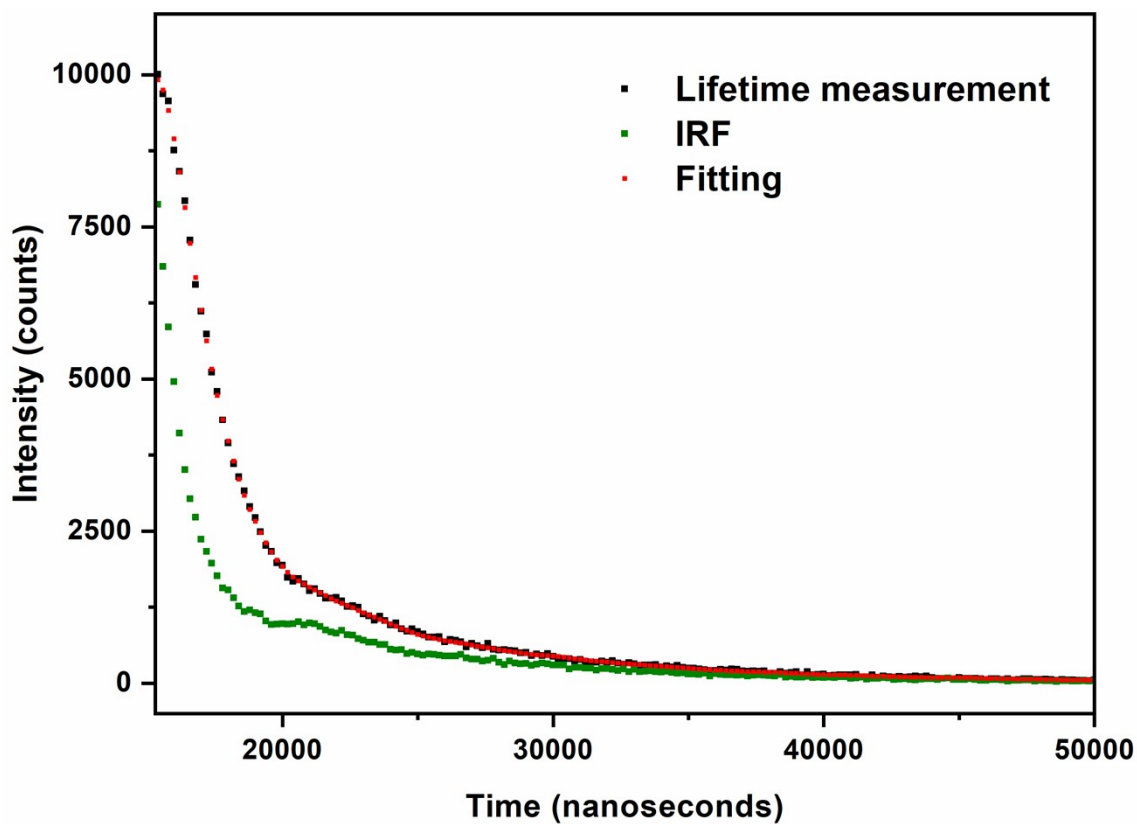

Figure S30. Lifetime decay for complex 2 at 77 K. \*IRF (Instrumental Response Function) is used to detect the scattered light from the sample.

|                            | Value    | Std Dev  |           | Value     | Std Dev  | Rel %  |
|----------------------------|----------|----------|-----------|-----------|----------|--------|
| $\tau_1$                   | 1.214E-6 | 1.024E-8 | <b>B1</b> | 2.206E-1  | 1.785E-3 | 100.00 |
| $\langle\tau\rangle_{amp}$ | 1.214E-6 | 1.024E-8 |           |           |          |        |
| <b>Chisq</b>               | 1.129    |          | <b>A</b>  | -7.617E-1 |          |        |
| <b>Shift</b>               | 1.474E-7 |          |           |           |          |        |

➤ Complex 3:

RT

Emission centred at 770 nm, excitation nanoled of 560 nm:

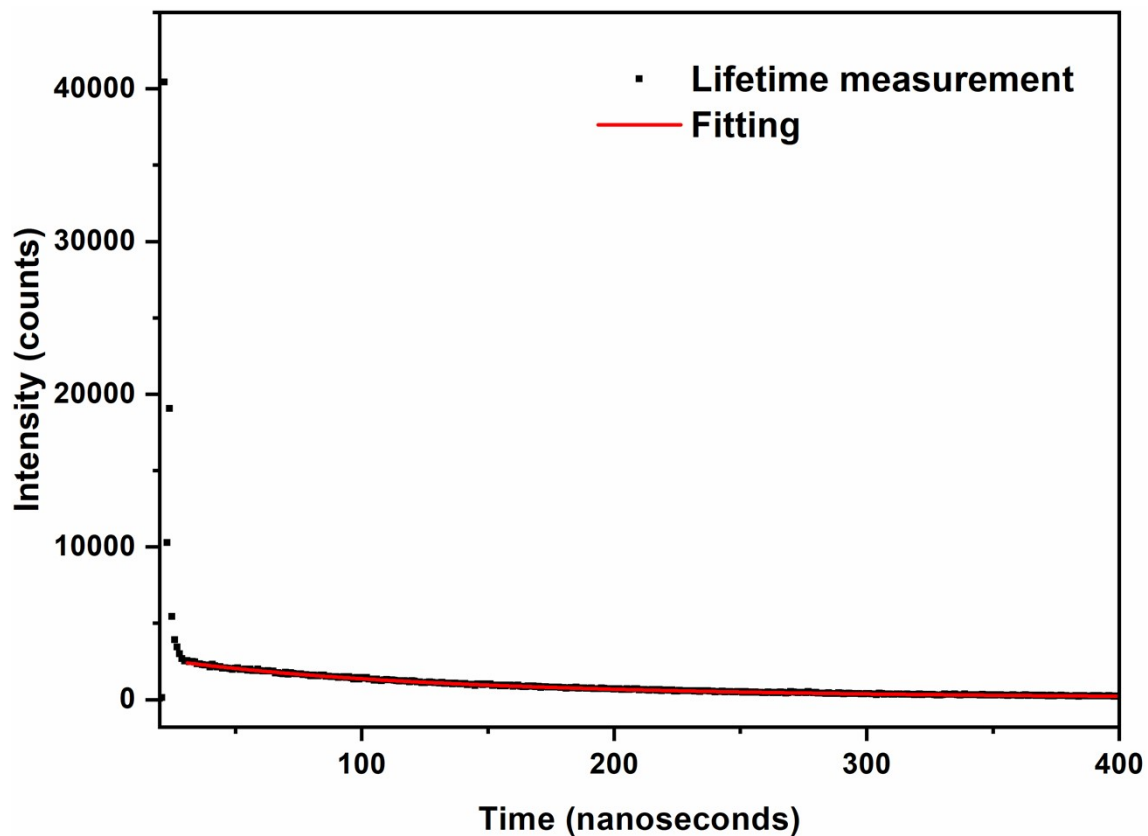

Figure S31. Lifetime decay for complex 3 at room temperature.

|                            | Value     | Std Dev   |           | Value    | Std Dev  | Rel % |
|----------------------------|-----------|-----------|-----------|----------|----------|-------|
| $\tau_1$                   | 1.089E-7  | 1.105E-8  | <b>B1</b> | 605.4062 | 13.44573 | 12.45 |
| $\tau_2$                   | 2.676E-07 | 1.614E-09 | <b>B2</b> | 1732.089 | 6.953588 | 87.55 |
| $\langle\tau\rangle_{amp}$ | 0.226E-6  |           |           |          |          |       |
| <b>Chisq</b>               | 1.030     |           | <b>A</b>  | 73.77539 |          |       |
| <b>Shift</b>               | 0         |           |           |          |          |       |

77 K

Emission centred at 880 nm, excitation of 760 nm:

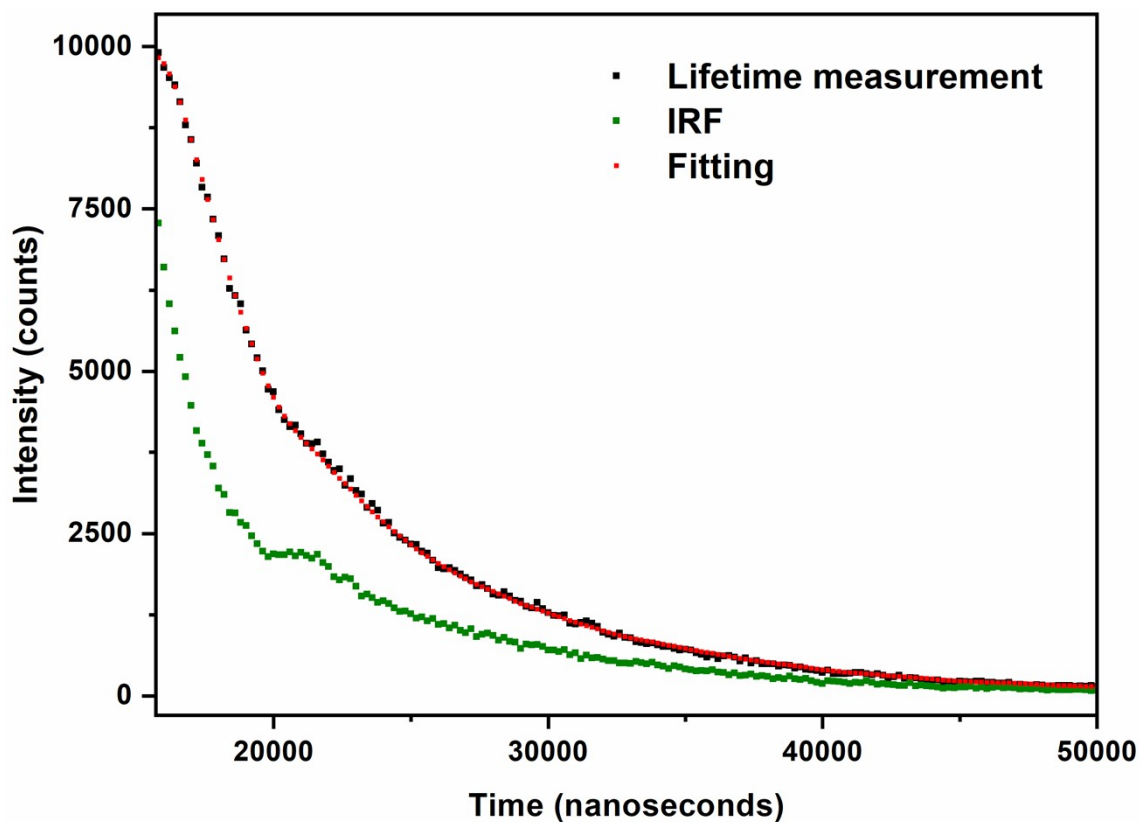

Figure S32. Lifetime decay for complex 3 at 77 K. \*IRF (Instrumental Response Function) is used to detect the scattered light from the sample.

|                            | Value    | Std Dev  |           | Value    | Std Dev  | Rel %  |
|----------------------------|----------|----------|-----------|----------|----------|--------|
| $\tau_1$                   | 1.734E-6 | 1.313E-8 | <b>B1</b> | 1.686E-1 | 1.184E-3 | 100.00 |
| $\langle\tau\rangle_{amp}$ | 1.734E-6 | 1.313E-8 |           |          |          |        |
| Chisq                      | 1.343    |          | <b>A</b>  | -1.713   |          |        |
| Shift                      | 2.705E-7 |          |           |          |          |        |

➤ Complex 4

RT

Emission centred at 530 nm, excitation nanoled of 390 nm:

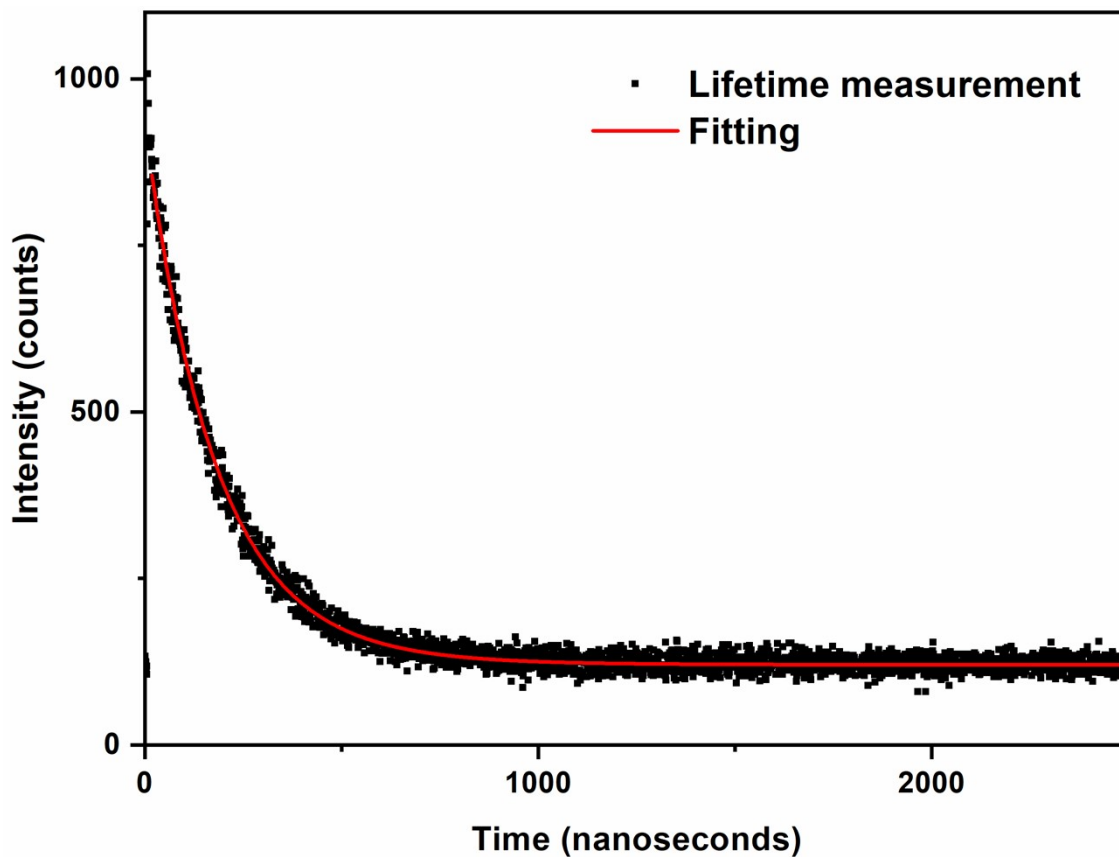

Figure S33. Lifetime decay for complex 4 at room temperature.

|                            | Value     | Std Dev   |           | Value    | Std Dev  | Rel % |
|----------------------------|-----------|-----------|-----------|----------|----------|-------|
| $\tau_1$                   | 4.419E-6  | 9.308E-8  | <b>B1</b> | 51.36509 | 4.808246 | 11.92 |
| $\tau_2$                   | 2.455E-06 | 4.740E-08 | <b>B2</b> | 683.2266 | 7.126466 | 88.08 |
| $\langle\tau\rangle_{amp}$ | 2.592E-6  |           |           |          |          |       |
| <b>Chisq</b>               | 1.038     |           | <b>A</b>  | 120.48   |          |       |
| <b>Shift</b>               | 0         |           |           |          |          |       |

77 K

Emission centred at 550 nm, excitation of 425 nm:

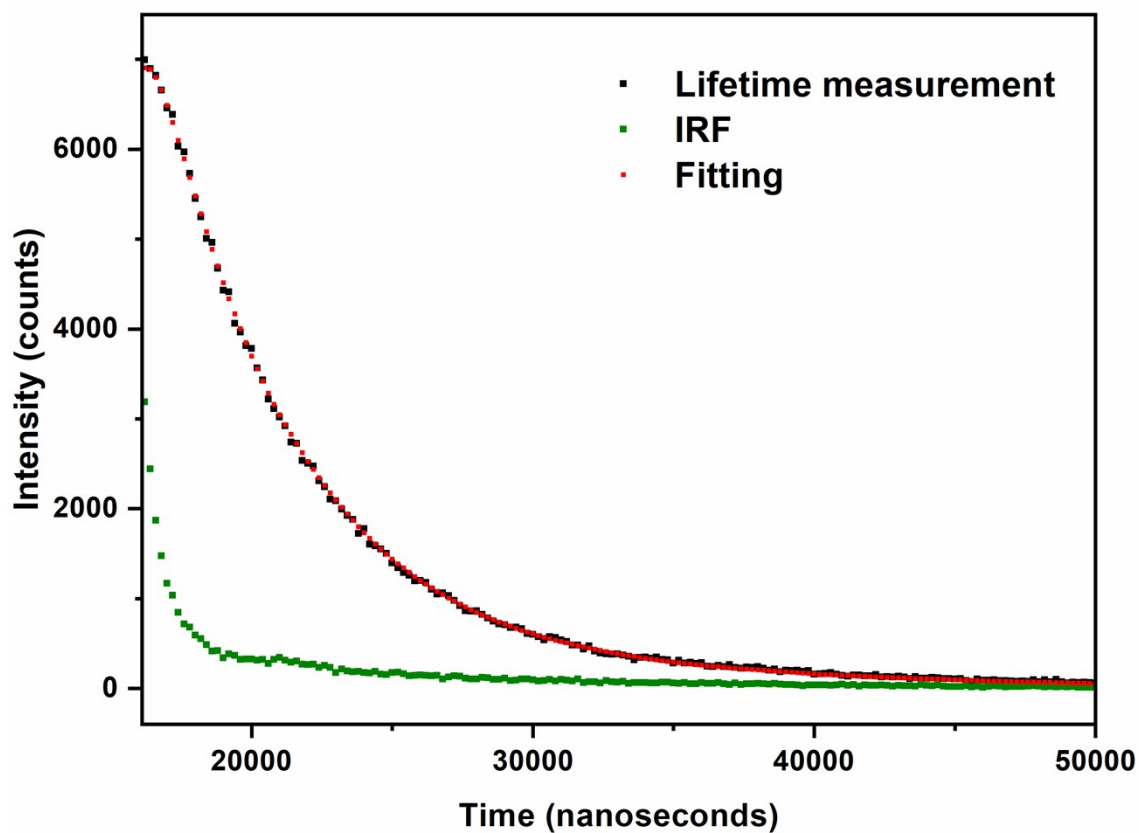

Figure S34. Lifetime decay for complex 4 at 77 K. \*IRF (Instrumental Response Function) is used to detect the scattered light from the sample.

|                            | Value    | Std Dev  |           | Value     | Std Dev  | Rel %  |
|----------------------------|----------|----------|-----------|-----------|----------|--------|
| $\tau_1$                   | 4.021E-6 | 1.338E-8 | <b>B1</b> | 1.173E-1  | 4.345E-4 | 100.00 |
| $\langle\tau\rangle_{amp}$ | 4.021E-6 | 1.338E-8 |           |           |          |        |
| Chisq                      | 1.130    |          | <b>A</b>  | -2.427E-1 |          |        |
| Shift                      | 3.495E-9 |          |           |           |          |        |

➤ Complex 5

RT

Emission centred at 780 nm, excitation nanoled of 495 nm:

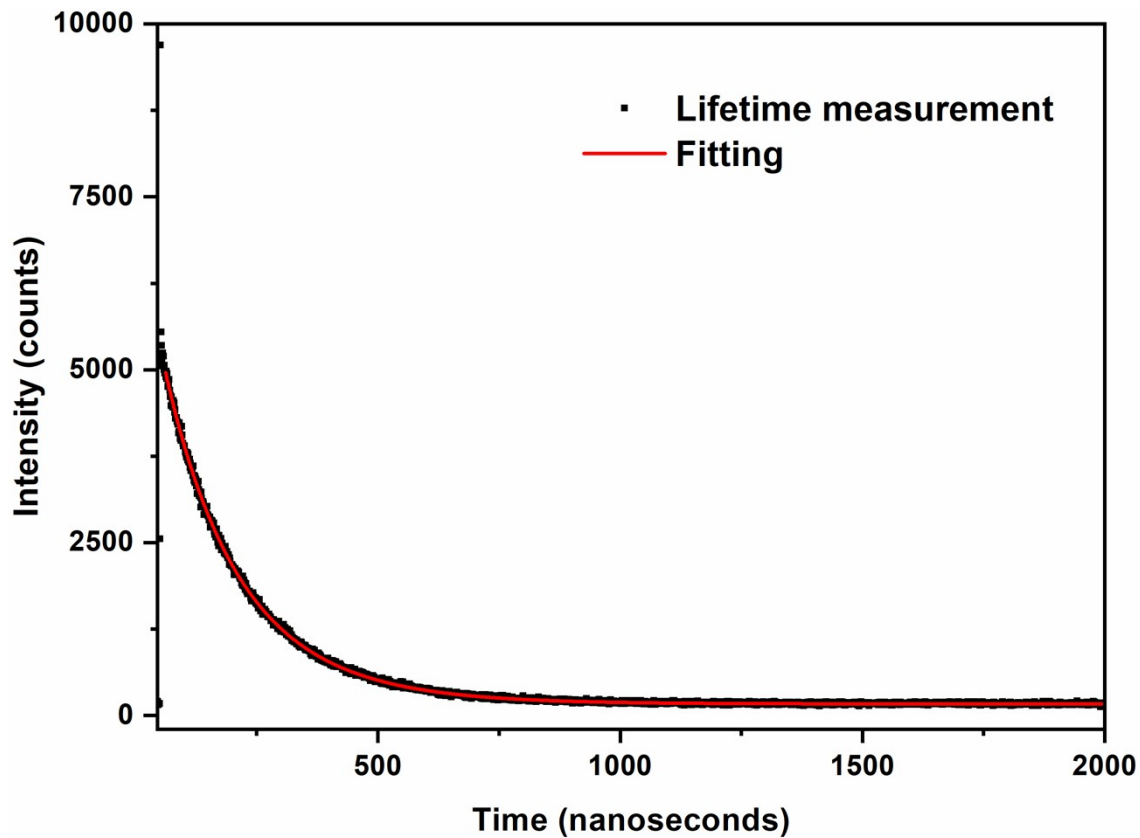

Figure S35. Lifetime decay for complex 5 at room temperature.

|                            | Value     | Std Dev   |           | Value    | Std Dev  | Rel % |
|----------------------------|-----------|-----------|-----------|----------|----------|-------|
| $\tau_1$                   | 1.955E-7  | 1.644E-8  | <b>B1</b> | 1567.938 | 21.10683 | 22.39 |
| $\tau_2$                   | 3.293E-07 | 2.235E-08 | <b>B2</b> | 3225.583 | 14.12141 | 77.61 |
| $\langle\tau\rangle_{amp}$ | 0.286E-6  |           |           |          |          |       |
| <b>Chisq</b>               | 0.995     |           | <b>A</b>  | 167.8747 |          |       |
| <b>Shift</b>               | 0         |           |           |          |          |       |

## II. Computational studies

### 1. Model systems

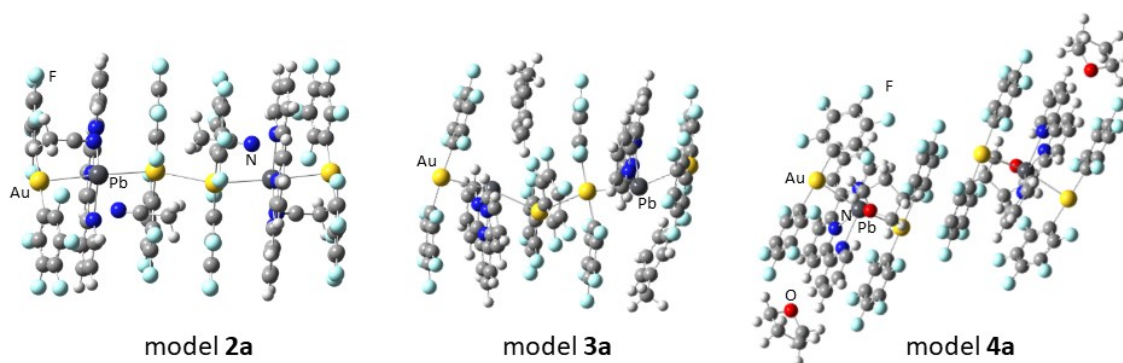

Figure S36. Representation of model systems 2a-4a.

### 2. Population analysis

#### ➤ Model system 2

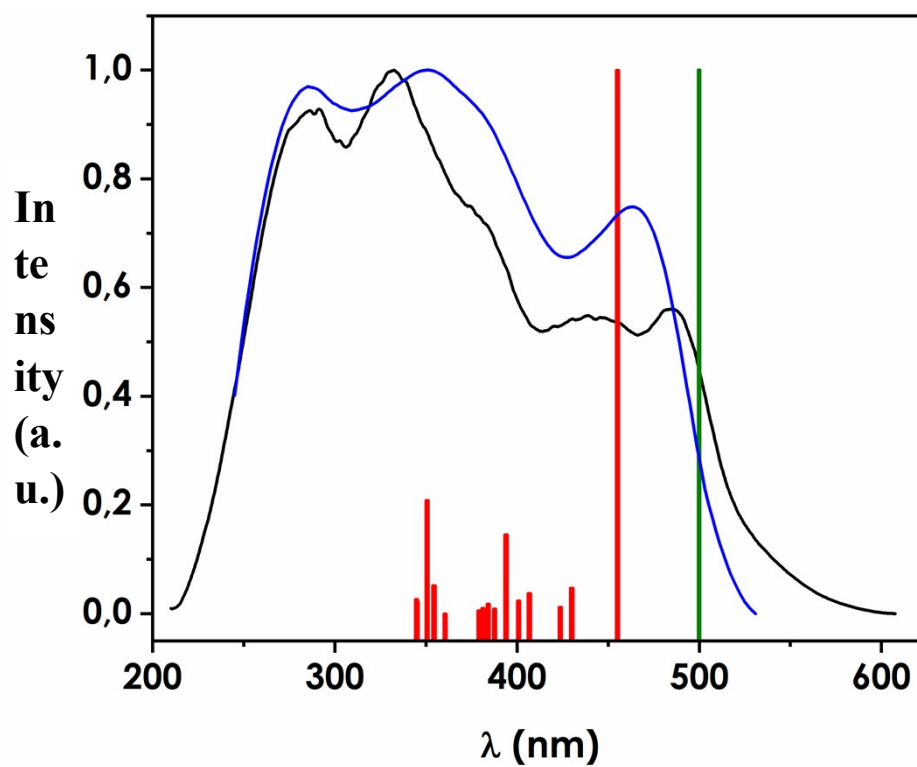

Figure S37. Comparison between solid-state UV-vis absorption spectra (black), theoretical singlet-singlet excitations (red) and theoretical singlet-triplet excitations (green) calculated from model 2a.



**Table S2.** Population analysis for model system **2a**. Contribution from each part of the molecule to the orbitals involved in the most important transitions (%)

| Orbital  | Au | Pb | terpy | C <sub>6</sub> F <sub>5</sub> | CH <sub>3</sub> CN |
|----------|----|----|-------|-------------------------------|--------------------|
| LUMO +1  | 4  | 8  | 80    | 0                             | 0                  |
| LUMO     | 12 | 20 | 54    | 12                            | 0                  |
| HOMO     | 62 | 10 | 2     | 24                            | 0                  |
| HOMO -8  | 8  | 2  | 4     | 86                            | 0                  |
| HOMO -9  | 4  | 0  | 8     | 86                            | 0                  |
| HOMO -14 | 54 | 12 | 8     | 22                            | 4                  |

➤ Model system **3**

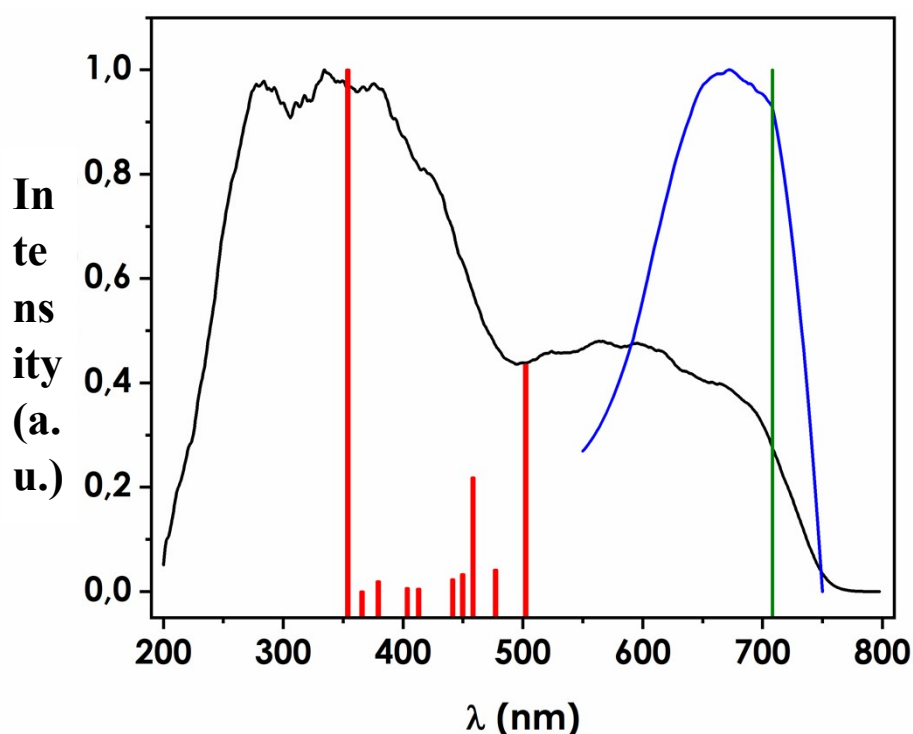

**Figure S38.** Comparison between solid-state UV-vis absorption spectra (black), theoretical singlet-singlet excitations (red) and theoretical singlet-triplet excitations (green) calculated from model **3a**.

**Table S3.** Population analysis for model system **3a**. Contribution from each part of the molecule to the orbitals involved in the most important transitions (%)

| Orbital | Au | Pb | terpy | C <sub>6</sub> F <sub>5</sub> | Toluene |
|---------|----|----|-------|-------------------------------|---------|
| LUMO +4 | 19 | 31 | 35    | 16                            | 0       |
| LUMO +3 | 0  | 0  | 98    | 1                             | 0       |
| LUMO +2 | 0  | 0  | 98    | 2                             | 0       |
| LUMO +1 | 7  | 8  | 78    | 6                             | 0       |
| LUMO    | 8  | 12 | 72    | 9                             | 0       |
| HOMO    | 49 | 8  | 2     | 28                            | 13      |

➤ Model system 4

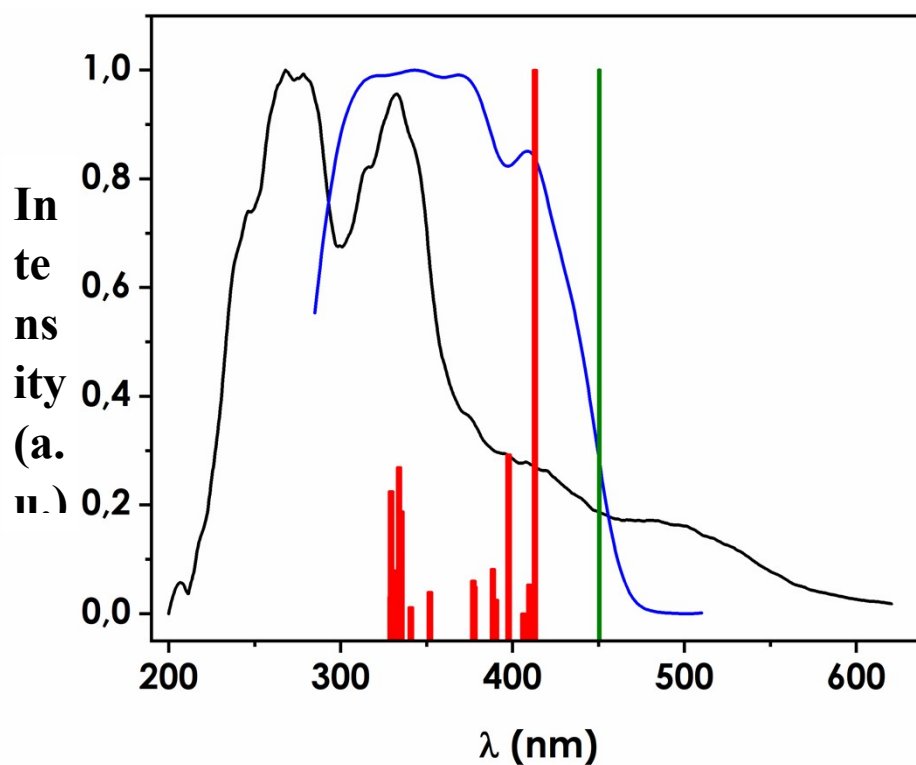

**Figure S39.** Comparison between solid-state UV-vis absorption spectra (black), theoretical singlet-singlet excitations (red) and theoretical singlet-triplet excitations (green) calculated from model **4a**.

**Table S4.** Population analysis for model system **4a**. Contribution from each part of the molecule to the orbitals involved in the most important transitions (%)

| Orbital  | Au | Pb | terpy | C <sub>6</sub> F <sub>5</sub> | THF |
|----------|----|----|-------|-------------------------------|-----|
| LUMO +3  | 0  | 1  | 97    | 2                             | 0   |
| LUMO +1  | 6  | 13 | 73    | 9                             | 0   |
| LUMO     | 8  | 13 | 70    | 8                             | 0   |
| HOMO     | 10 | 1  | 3     | 84                            | 0   |
| HOMO -1  | 29 | 4  | 3     | 62                            | 2   |
| HOMO -3  | 36 | 6  | 4     | 53                            | 3   |
| HOMO -5  | 40 | 7  | 3     | 43                            | 3   |
| HOMO -9  | 0  | 0  | 10    | 89                            | 0   |
| HOMO -19 | 3  | 0  | 78    | 20                            | 0   |
